# Supplementary material
Source: PubMed Central journal article supplement (PMC5589073)
Supplement: NIHMS892384-supplement.pdf [file NIHMS892384-supplement.pdf]

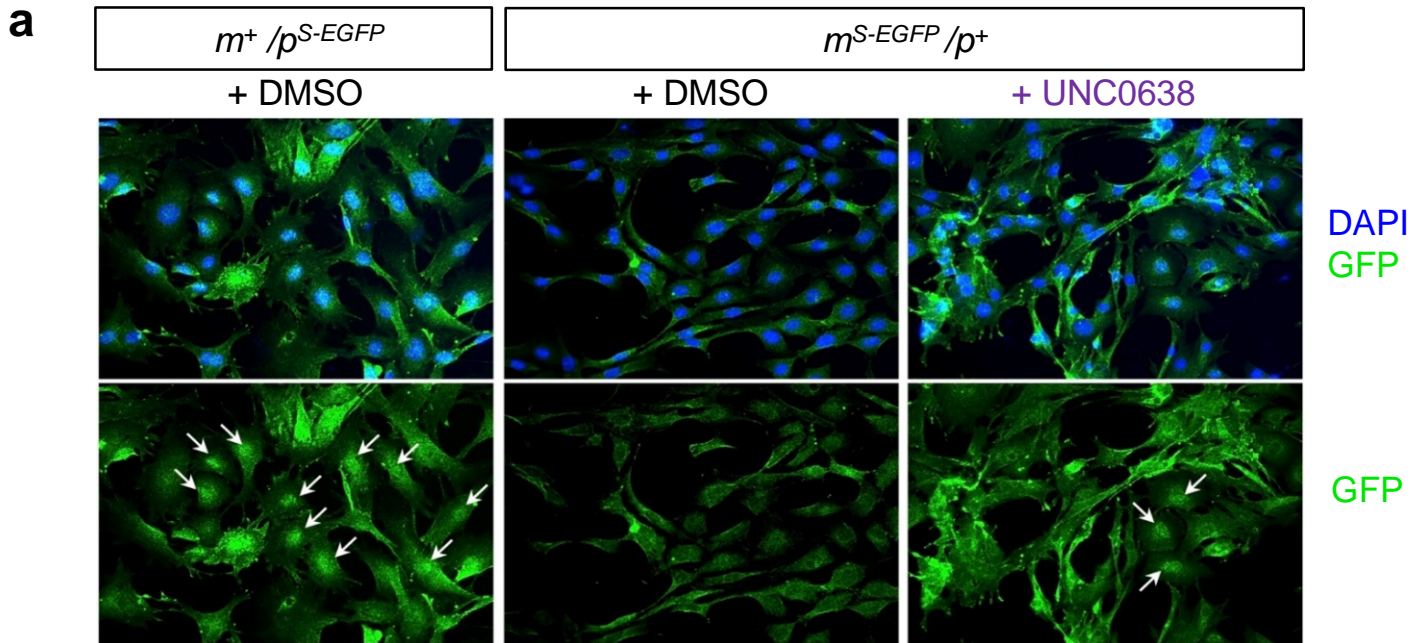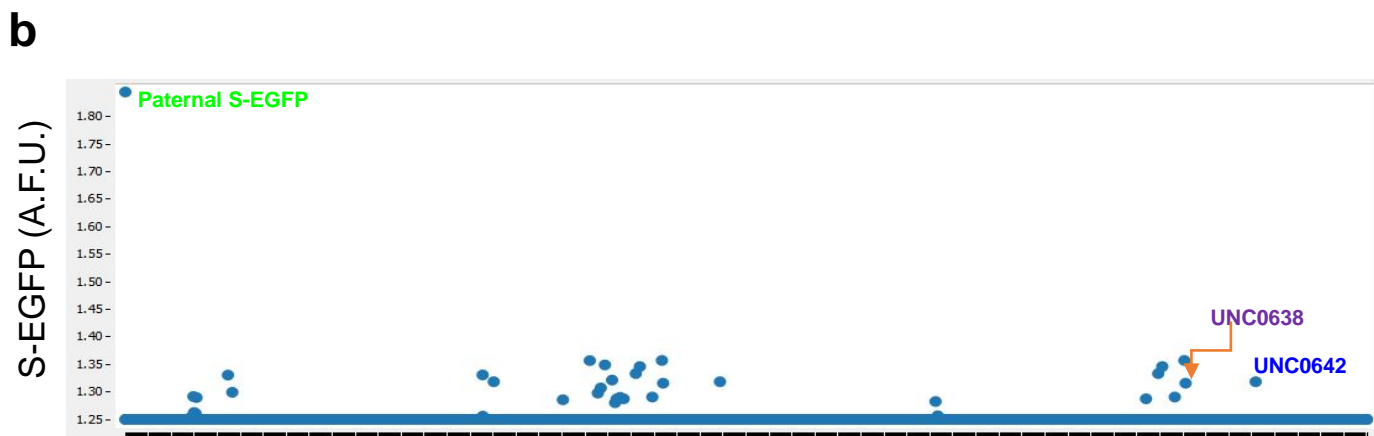

**Supplementary Figure 1. Validation and active compound data plot from HCS. (a)** Determination of depressing Snrpn-EGFP in UNC0638-treated  $m^{S-EGFP}/p^+$  MEFs (right: nuclear EGFP signal (arrows)). Paternal expression of Snrpn-EGFP in  $m^+/p^{S-EGFP}$  MEFs (left, positive control); vehicle-treated  $m^{S-EGFP}/p^+$  MEFs (middle, negative control). **(b)** Highlighted 32 potential compounds derepressing Snrpn-EGFP over 125%. The chemical libraries are listed in **Supplementary Table 1** and 32 potential active compounds are listed in the **Supplementary Table 2**. All data were plotted by GENE-E (<http://www.broadinstitute.org/cancer/software/GENE-E/index.html>).

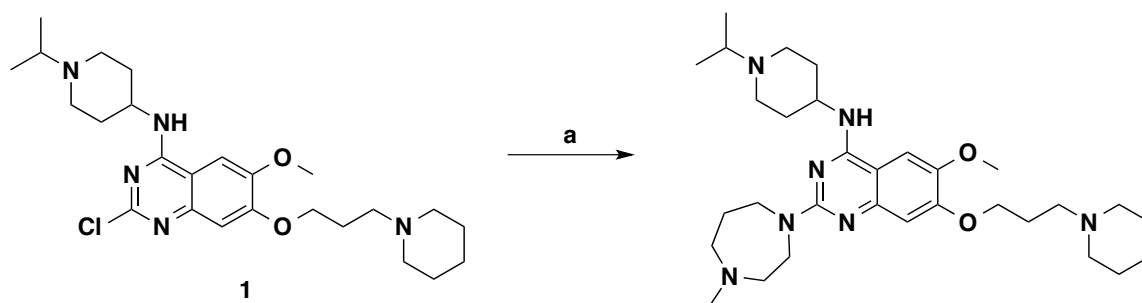

(a) 1-methyl homopiperazine,  $\text{CF}_3\text{COOH}$ , *i*-PrOH, 160°C, 72%.

**Supplementary Figure 2. Synthesis of UNC617. N-(1-isopropylpiperidin-4-yl)-6-methoxy-2-(4-methyl-1,4-diazepan-1-yl)-7-(3-(piperidin-1-yl)propoxy)quinazolin-4-amine.**

A mixture of compound 1 (70 mg, 0.15 mmol), 1-methyl homopiperazine (34 mg, 0.30 mmol), and TFA (46  $\mu\text{L}$ , 0.60 mmol) in *i*-PrOH (0.2 mL) in a sealed tube was heated by microwave irradiation to 160°C for 15 min. After concentration in vacuo, the crude product was purified by preparative HPLC with a gradient from 10% of MeOH in 0.1% TFA in  $\text{H}_2\text{O}$  to 100% MeOH. The resulting product was basified with saturated aq.  $\text{NaHCO}_3$  and extracted with  $\text{CH}_2\text{Cl}_2$  to afford the title compound as a yellow solid (60 mg, 0.11 mmol, 72% yield).  $^1\text{H}$  NMR (400 MHz,  $\text{CDCl}_3$ )  $\delta$  6.87 (s, 1H), 6.72 (s, 1H), 5.00 (d,  $J = 8.0$  Hz, 1H), 4.11 (t,  $J = 6.0$  Hz, 2H), 4.05-4.01 (m, 1H), 3.96-3.94 (m, 2H), 3.87-3.83 (m, 5H), 2.89 (app. d,  $J = 12.0$  Hz, 2H), 2.77-2.70 (m, 1H), 2.69-2.66 (m, 2H), 2.56-2.53 (m, 2H), 2.43 (t,  $J = 8.0$  Hz, 2H), 2.38-2.26 (m, 9H) 2.15 (app. d,  $J = 12.0$  Hz 2H), 2.06-1.95 (m, 4H), 1.60-1.50 (m, 6H), 1.42-1.39 (m, 2H), 1.05 (d,  $J = 4.0$  Hz, 6H).  $^{13}\text{C}$  HNMR (100 MHz,  $\text{CDCl}_3$ , 5 overlapping peaks)  $\delta$  158.5, 157.9, 153.9, 149.6, 145.1, 106.9, 102.6, 101.5, 67.3, 58.9, 57.3, 56.6, 55.7, 54.5(2C), 54.4(2C), 48.6, 47.7, 46.7, 45.8, 45.8, 32.5, 27.8, 26.4(2C), 25.9(2C), 24.4, 18.4(2C). HPLC: 98%;  $t_{\text{R}}$  0.56 min. HRMS (TOF) calcd for  $\text{C}_{31}\text{H}_{52}\text{N}_7\text{O}_2$   $[\text{M}+\text{H}]^+$ , 554.4177; found 554.4192.

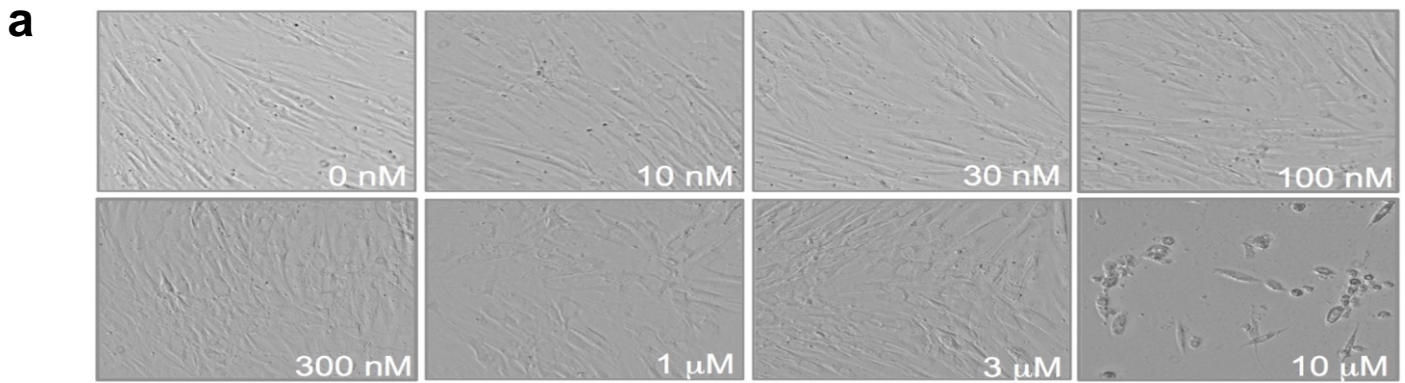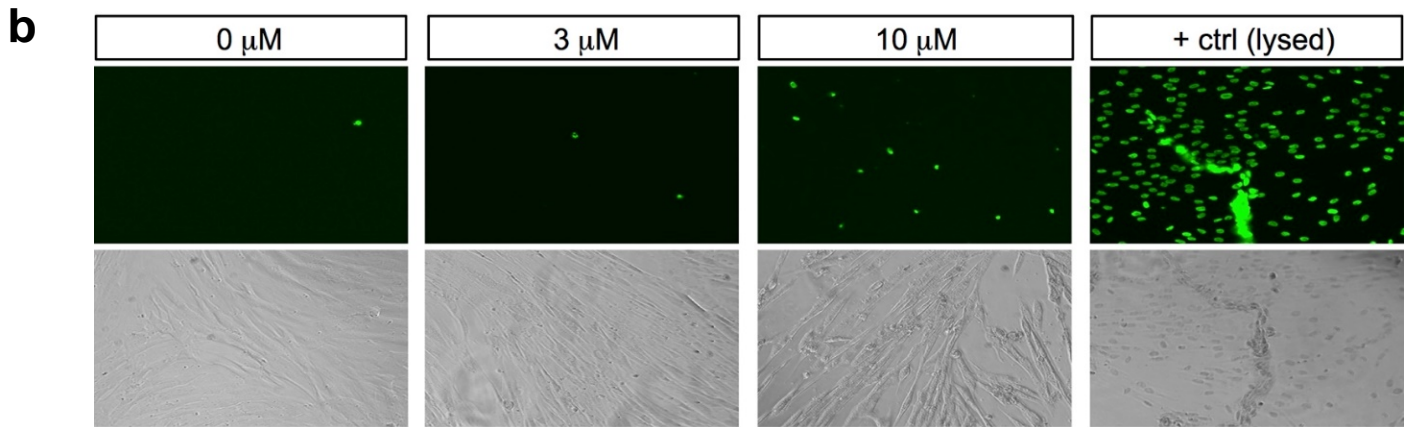

dying cells (green, top)    bright field (bottom)

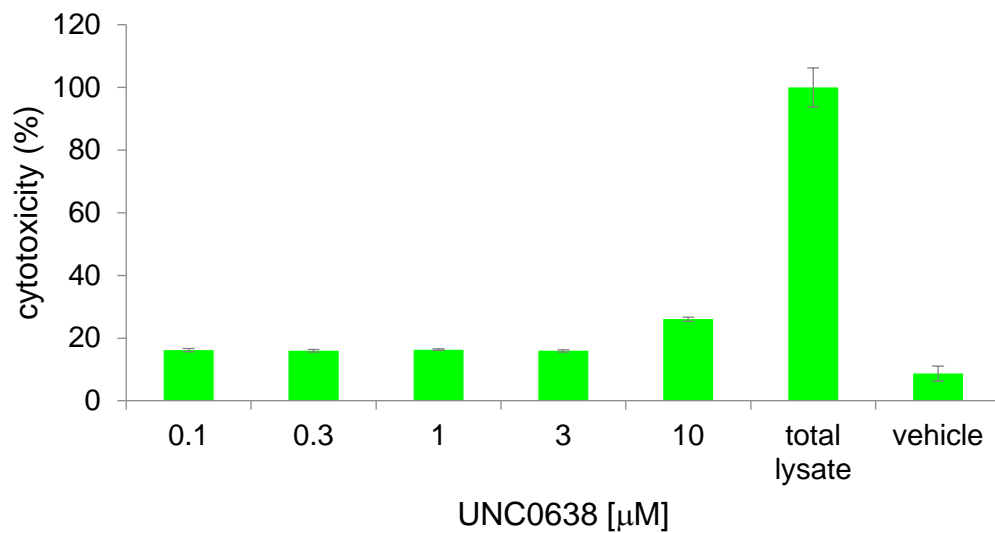

**Supplementary Figure 3. Evaluation of drug toxicity.** (a) Gross cell morphology at various dosage increments. Few cells are viable upon the exposure to 10  $\mu\text{M}$  for 72-hr. (b) Quantification of cytotoxicity. Cytotoxicity is given as a percentage of cell death in drug-treated cells to cell death of completely lysed cells (bottom graph: ANOVA-Dunnett;  $P < 0.05$ [10  $\mu\text{M}$ ];  $n = 4$  per group, data are mean (%)  $\pm$  s.e.m.).

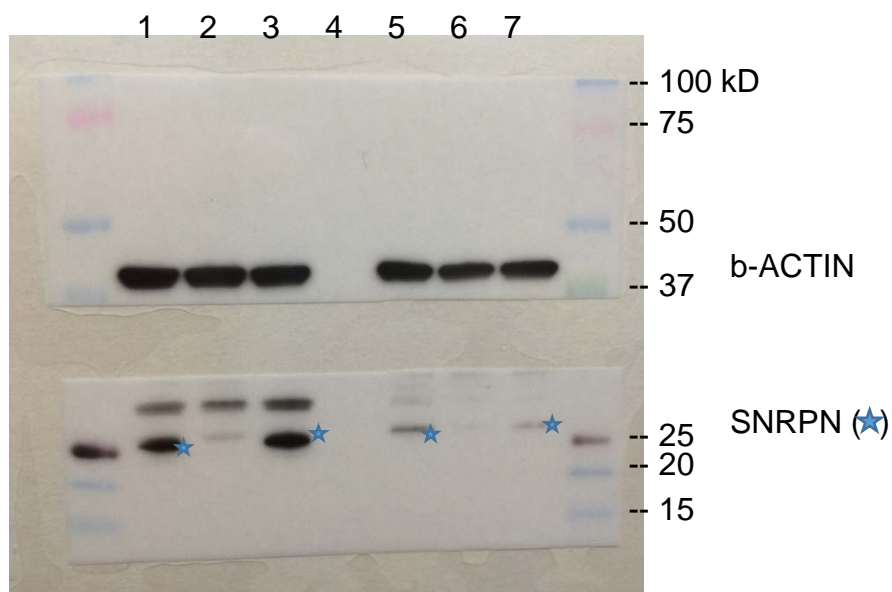

1. Liver from UNC0642-treated  $m^+/p^{\Delta S-U}$
2. Liver from PBS-treated  $m^+/p^{\Delta S-U}$
3. Liver from PBS-treated  $m^+/p^+$
4. -
5. Mock-treated control human fibroblast
6. Mock-treated PWS human fibroblast
7. UNC0638-treated PWS human fibroblast

**Supplementary Figure 4. Original western blots for figure 2e.** Lane 1, 2, and 3 of the blot indicated western blot analysis of the drug treated liver from PWS mouse model. Lane 5, 6, and 7 of the blot represented figure 2e, indicating western blot analysis of the drug treated PWS fibroblast cells. Note. The membrane blots were trimmed after transferring.



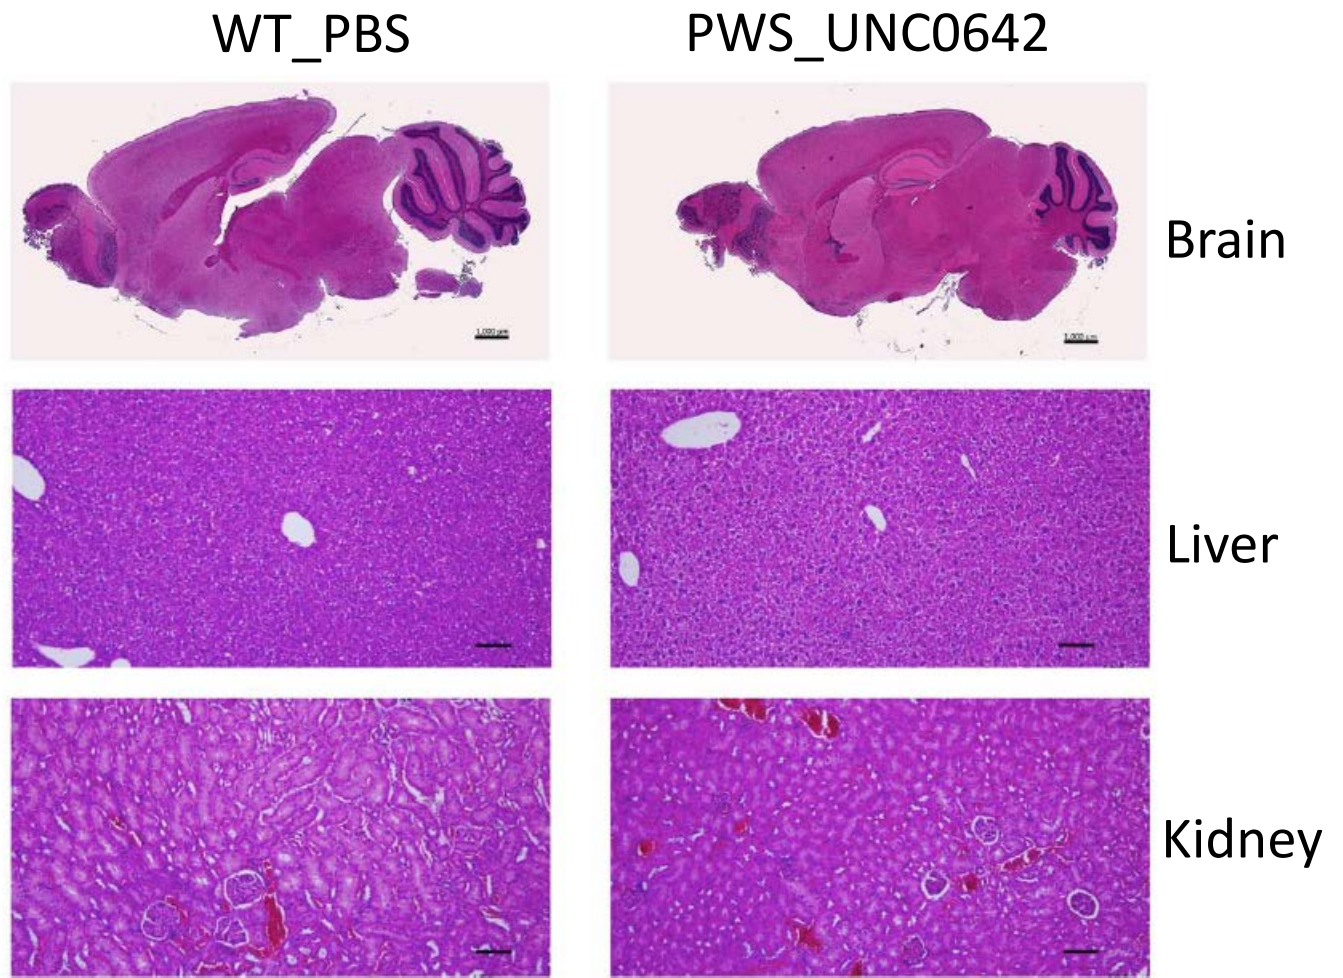

**Supplementary Figure 5. Photomicrographs of UNC0642-treated PWS and vehicle-treated WT animals at age of 3 month-old.** Hematoxylin and eosin stained sagittal sections of brain (scale bar, 1000  $\mu$ m), liver and kidney (scale bar, 1000  $\mu$ m). Histopathologic examination revealed no significant compound related lesions in any of the tissues examined (lung and heart, not shown).

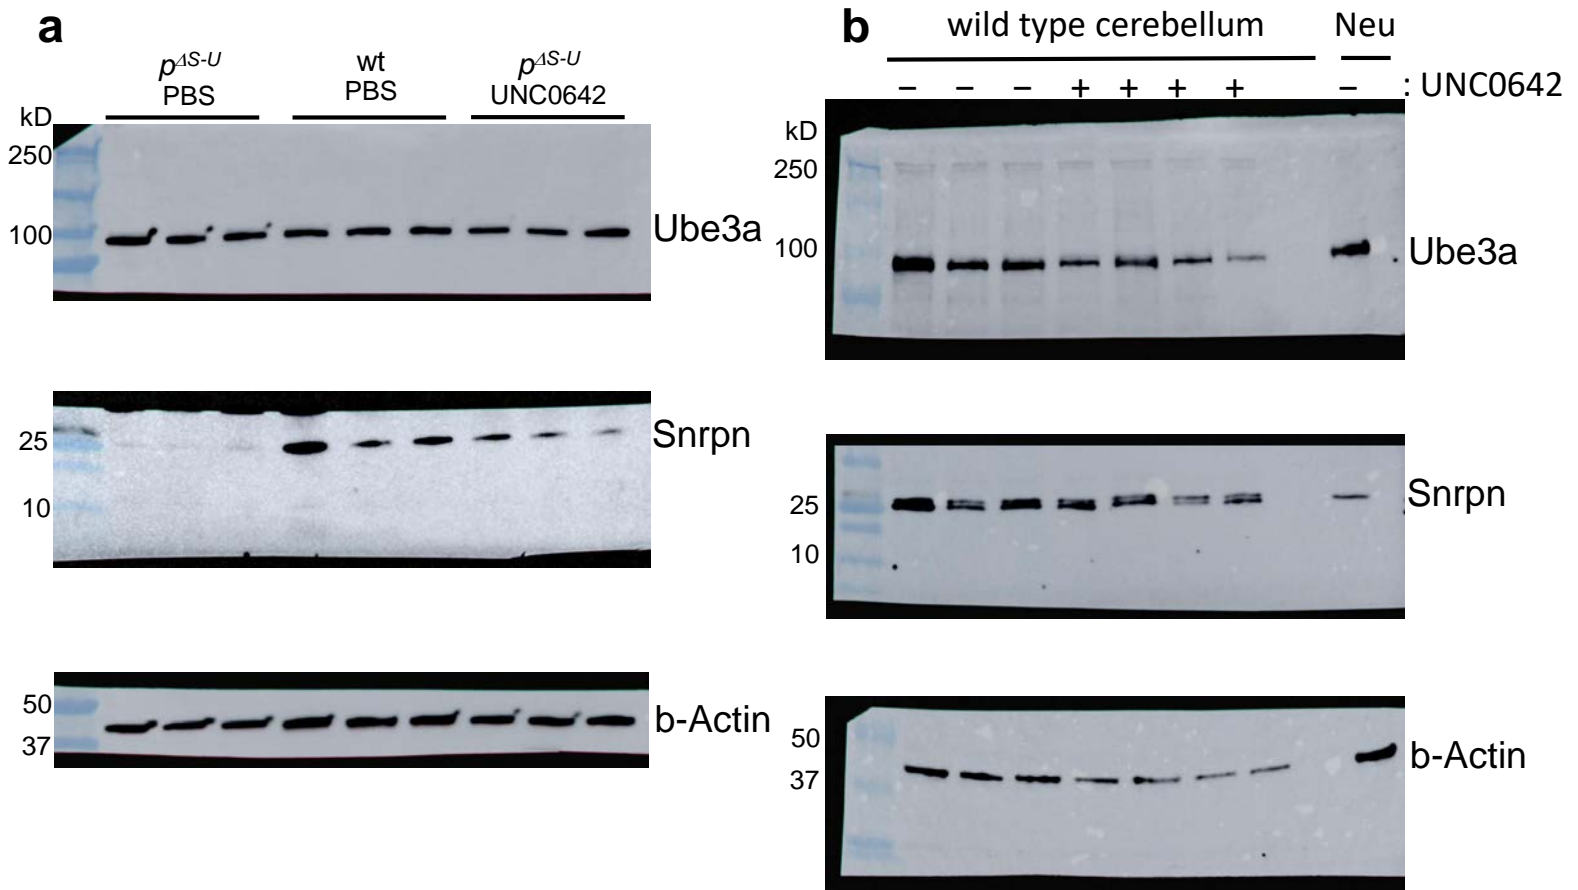

**Supplementary Figure 6. Angelman syndrome UBE3A expression was not affected by UNC0642.** (a) Original western blots for figure 4d. Note. The membrane blots were trimmed after transferring. (b) Normalized protein levels of UBE3A and SNPRN in cerebellum following *in vivo* treatment with PBS (-) or UNC0642 (+, 5 mg/kg, three daily *i.p.* injections). Neu, cultured primary cortical neurons, was included as internal control (*t*-test; \*  $P < 0.05$ ;  $n = 3$  for PBS and  $n = 4$  for UNC0642, data are mean  $\pm$  s.e.m.). Note. The membrane blots were trimmed after transferring.

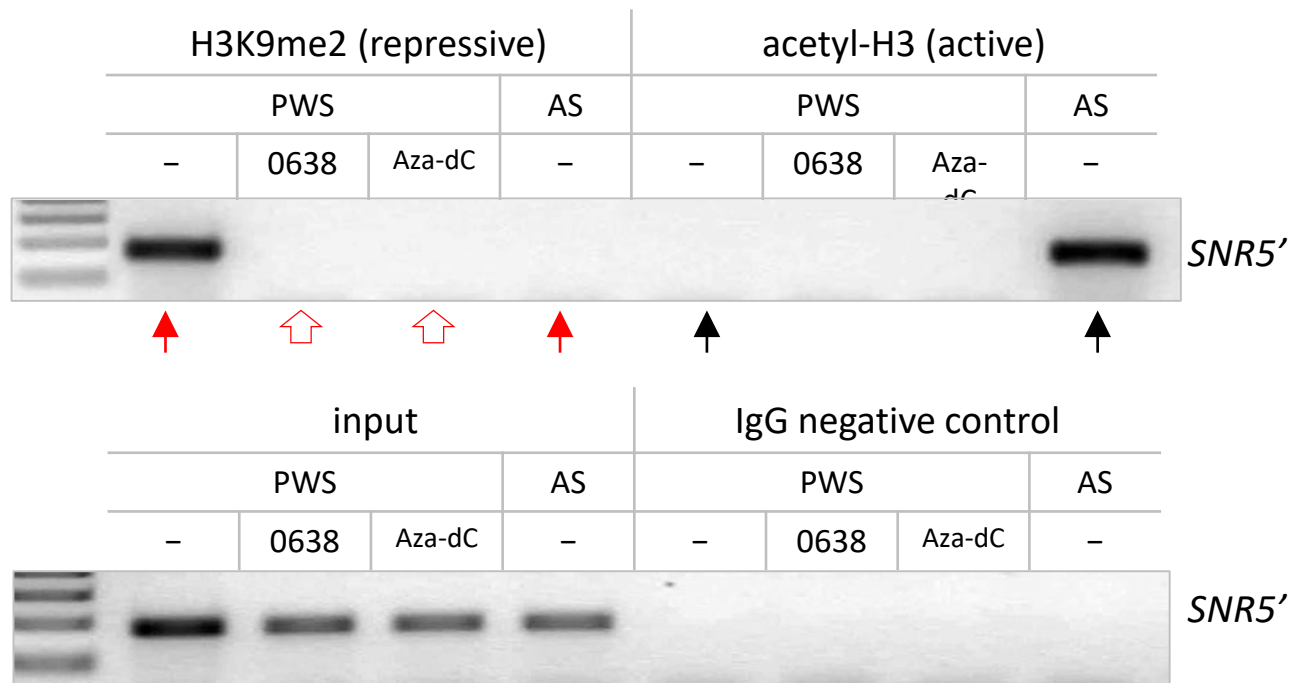

**Supplementary Figure 7. Verification of ChIP assay in the PWS/AS cell lines.** ChIP

Experiments were performed on two or more independent cultures of human PWS or Angelman syndrome (AS) fibroblasts using H3K9me2, a heterochromatin marker, and acetyl-H3, an euchromatin marker. PWS cells have a paternal deletion of human 15q11-q13 and AS cells have a maternal deletion of 15q11-q13. The enrichment of Histone H3 acetylation (acetyl-H3) or H3K9me2 was determined by *q*PCR amplification (40 cycles) using a primer pair in the CpG island of *SNRPN* which overlaps with the PWS-IC. The allelic specific histone modifications of the PWS-IC is confirmed by the reciprocal pattern of H3K9me2 (filled red arrows) and H3 acetylation (black arrows) in PWS versus AS cells. UNC0638 and DNMT inhibitor (5-Aza-dC) reduced the level of H3K9me2 in treated PWS fibroblasts (open red arrows; 4 $\mu$ M UNC0638 or 10 $\mu$ M 5-Aza-dC, 72 hr).

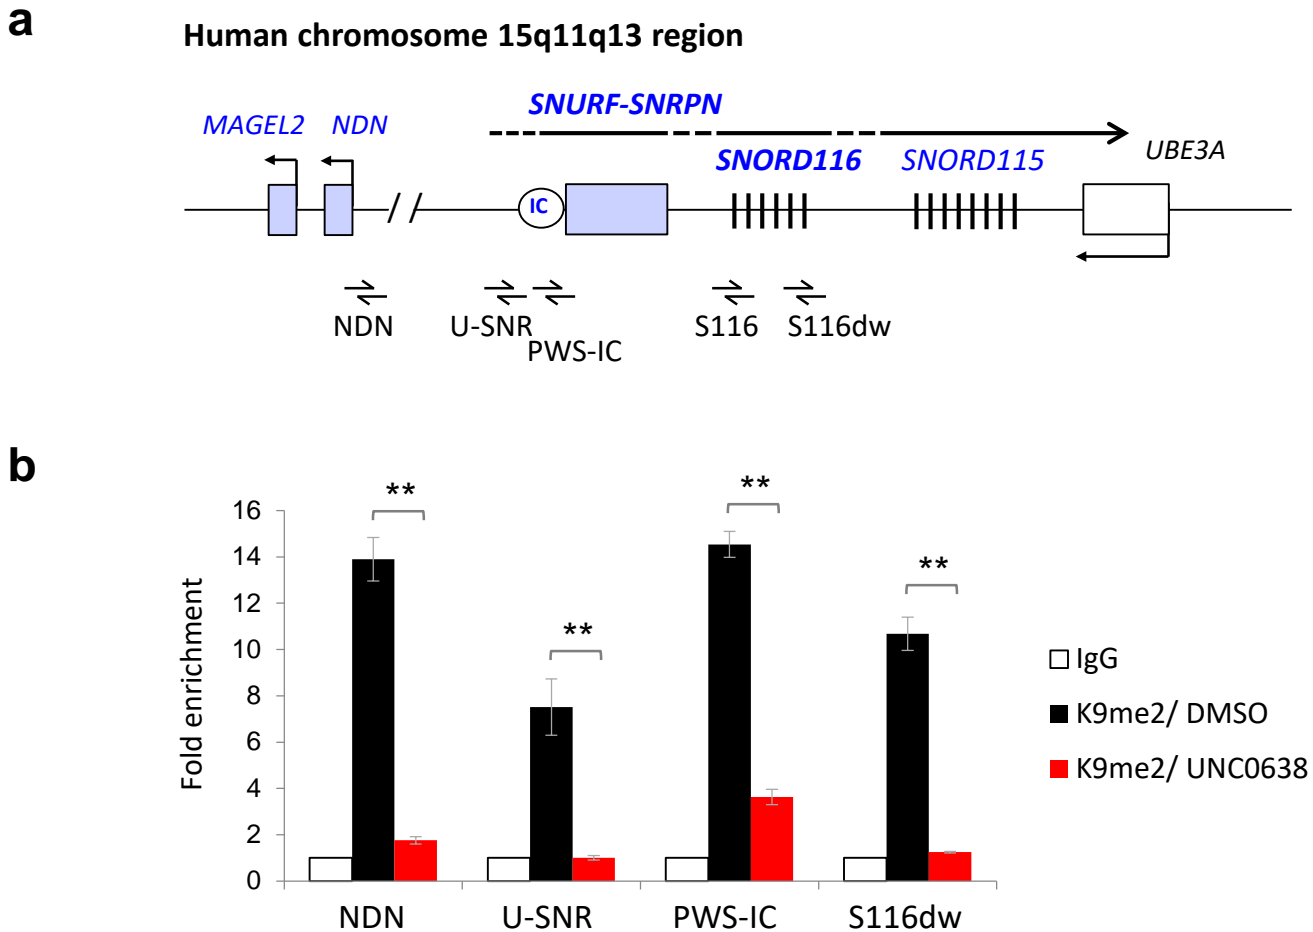

**Supplementary Figure 8. Enrichment of H3K9me2 at different PWS candidate gene loci (a)**

The positions of PCR primer pairs used for chromatin assays across the 15q11-q13 region including NDN (the promoter region of *NDN*); U-SNR (the region at the most upstream of untranslated exons of *SNRPN*); PWS-IC (the region overlap with the CpG island of *SNRPN* and PWS-IC); and *S116dw* (the 3' region of *SNORD116* cluster). *S116* (the 5' region of *SNORD116* cluster) is shown in Fig 4b-d. (b) ChIP-qPCR analysis of H3K9me2 in PWS imprinted domain. The levels of H3K9me2 association with the silent maternal copy of PWS genes are shown. Reduction of H3K9me2 by UNC0638 occurred at the examined sites across PWS imprinted domain. Especially, UNC0638 caused the reduction of H3K9me2 at *NDN* loci. (*t*-test; \*\*  $P < 0.01$ ;  $n = 3$  per group, data are mean  $\pm$  s.e.m.)



**a**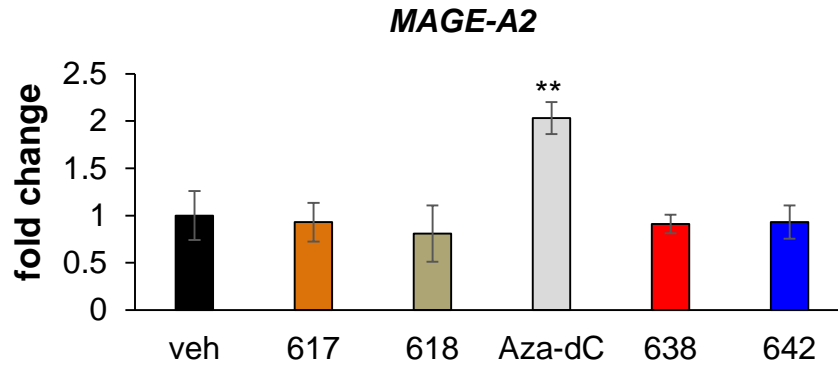**b**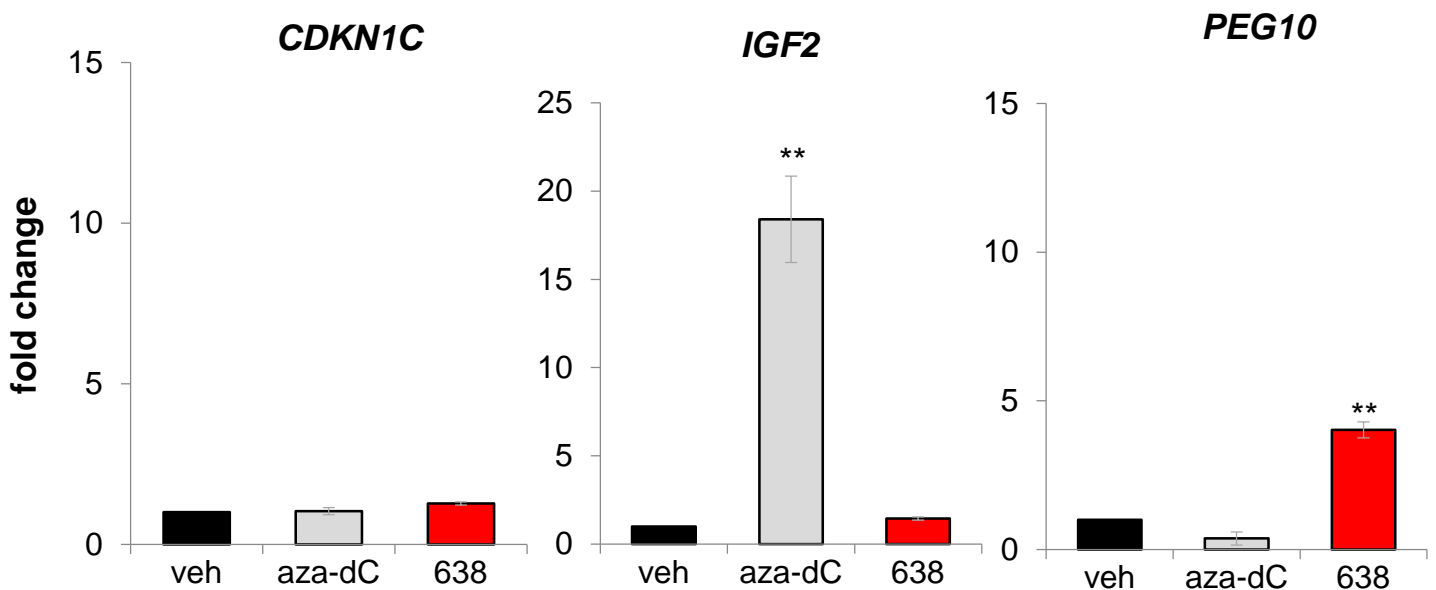

**Supplementary Figure 9. Changes in silent genes at the presence of G9a inhibitors. (a)**

MAGE-A2 transcript was not increased in the PWS cells treated with the G9a inhibitors. DNA methyltransferase inhibitor (5-Aza-dC), however, increased *MAGE-A2* transcription (*t*-test; \*\*  $P < 0.01$ ;  $n = 3$  per veh and  $n = 4$  per drugs, data are mean  $\pm$  s.e.m.) **(b)** Other imprinting loci (*CDKN1C*, Chr11p15.5; *IGF2*, Chr11p15.5; *PEG10*, Chr7q21) in the human PWS fibroblast at the presence of UNC0638 or 5-Aza-deoxycytidine. UNC0638 induced transcriptional increases of *PEG10*, while 5-Aza-dC induced *IGF2*. (*t*-test; \*\*  $P < 0.01$ ;  $n = 3$  per veh and  $n = 4$  per UNC0638, data are mean  $\pm$  s.e.m.)

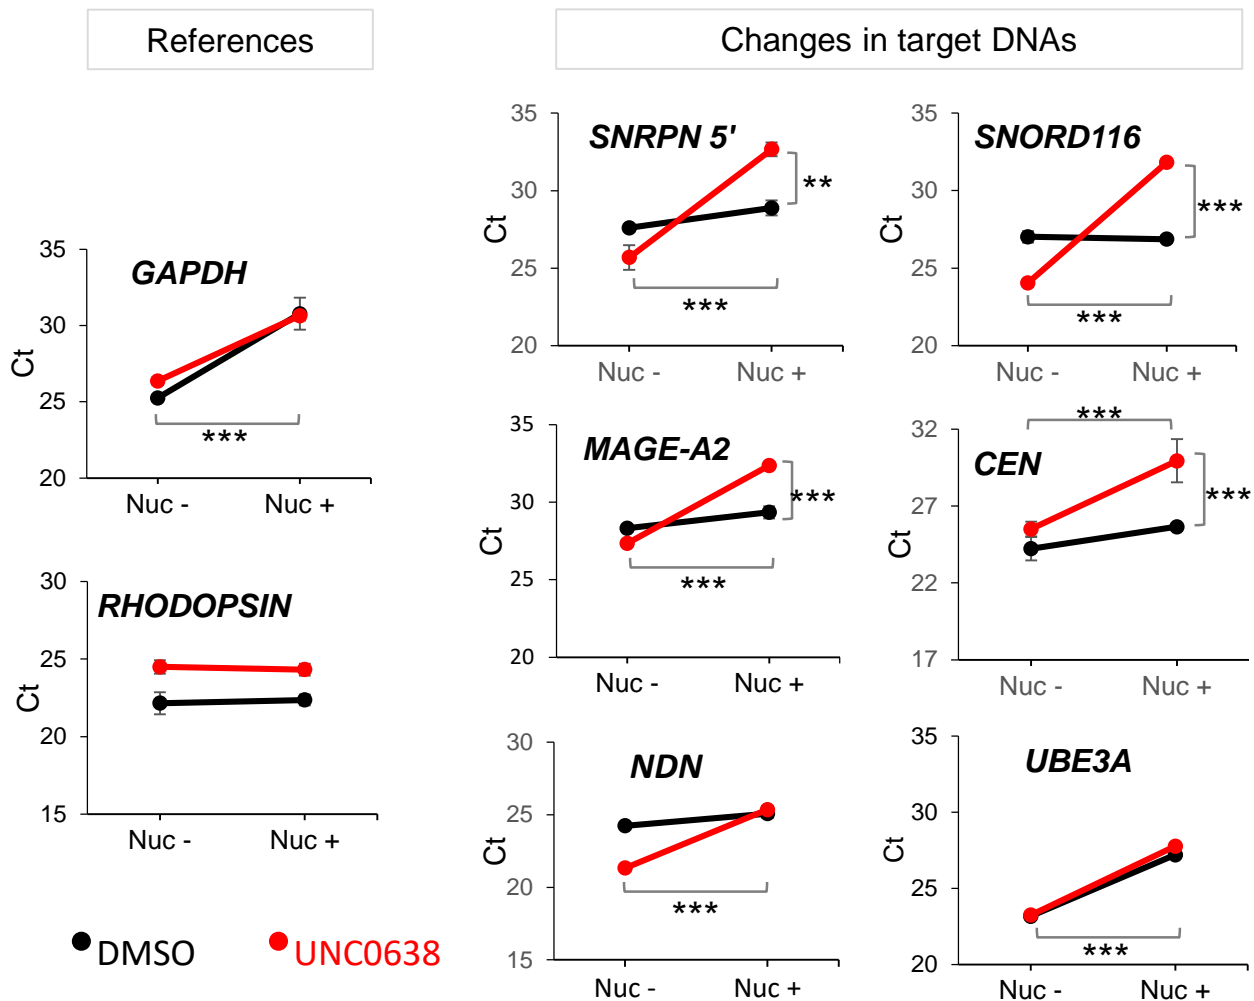

**Supplementary Figure 10. Chromatin state at the silent maternal PWS region is H3K9me2 dependent.**

The chromatin accessibility of genomic loci across PWS region assessed by genomic qPCR. The increase of Ct (threshold cycle), i.e. lower amount of target DNA indicates high susceptibility to nuclease (MNases) digestion and more open chromatin, as for the case of constitutively active *GAPDH* in Reference (left).

UNC0638 elevated chromatin accessibilities in *SNRPN5'*, *SNORD116*, *MAGE-A2*, *CEN*, and *NDN*, but not in *UBE3A* (two way ANOVA analysis; GAP: Drug/P > 0.05, F=0.998; Nuc/\*\*\* P < 0.0001, F=308.7; Interaction/P > 0.05, F=1.182; RHO: Drug/P > 0.05, F=1.932; Nuc/P > 0.05, F=0.039; Interaction/P > 0.05, F=0.629; SN5': Drug/\*\* P < 0.01, F=16.29; Nuc/\*\*\* P < 0.0001, F=166.9; Interaction/P < 0.0001, F=129.3; SNO116: Drug/\*\*\* P < 0.0001, F=58.96; Nuc/\*\*\* P < 0.0001, F=865.8; Interaction/P < 0.0001, F=935.4; MAGE: Drug/\*\*\* P < 0.0001, F=105.9; Nuc/\*\*\* P < 0.0001, F=916.6; Interaction/P < 0.0001, F=398.7; CEN: Drug/\*\*\* P < 0.0001, F=44.17; Nuc/\*\*\* P < 0.0001, F=48.8; Interaction/P < 0.005, F=12.82; NDN: Drug/\*\*\* P < 0.0001, F=130.6; Nuc/\*\*\* P < 0.0001, F=443.3; Interaction/P < 0.0001, F=191.4; UBE3A: Drug/P > 0.05, F=2.046; Nuc/\*\*\* P < 0.0001, F=6569; Interaction/P > 0.05, F = 0.00004873; n = 3 per group and 7 per target, data are mean ± s.e.m.).

**Supplementary Table 1. Summary of small molecule libraries.**

| Library                     | No.         | Description                                                         | Potential actives  |
|-----------------------------|-------------|---------------------------------------------------------------------|--------------------|
| NCC1                        | 446         | NIH Clinical Collection 1 - most anti-cancer drugs                  |                    |
| NCC2                        | 320*        | NIH Clinical Collection 2 - most anti-cancer drugs                  |                    |
| X-901                       | 271         | NIMH CNS drugs                                                      |                    |
| SMART                       | 320         | CNS penetrating drugs / IRSF                                        |                    |
| Roth                        | 456         | CNS and GPCR targeting / Roth Lab Library, UNC                      |                    |
| Tocris Mini                 | 1120        | Biologically active compounds / Commercial / Tocris                 |                    |
| PKIS**                      | 367         | GlaxoSmithKline kinase inhibitors                                   |                    |
| Prestwick                   | 1120        | FDA, EMA approved drug / Commercial / Prestwick Chemicals           |                    |
| LOPAC                       | 1280        | Pharmacologically active compounds / Commercial / Sigma             |                    |
| Spectrum                    | 2400        | Biologically active compounds / Commercial / MicroSource            |                    |
| Epigenetic collection A     | 959         | UNC synthetic epigenetic compounds / random collection              |                    |
| Epigenetic collection B     | 73          | UNC synthetic epigenetic compounds / random collection              |                    |
| UNC.Epigenetic collection C | 25          | UNC synthetic epigenetic compounds / random collection              | UNC0638<br>UNC0642 |
| <b>Subtotal</b>             | <b>9157</b> |                                                                     |                    |
| Selected compounds          | 295         | Selectively chosen compounds that were tested to validate or repeat |                    |
| <b>Total</b>                | <b>9452</b> |                                                                     |                    |

NCC: NIH Clinical Collection, IRSF: International Rett Syndrome Foundation.

\* NCC2 collection originally contains 281 compounds, however, we added 39 PDSP compounds to make arrayed 96-well drug plates

\*\* PKIS. The GlaxoSmithKline Published Kinase Inhibitor Set

**Supplementary Table 2. The list of initial active compounds potentially increasing over 125% of AFU in Snprn-EGFP.**

| Name of compounds                     | AFU   | SEM   | True/<br>False | Note                                                               |
|---------------------------------------|-------|-------|----------------|--------------------------------------------------------------------|
| UNC0638                               | 1.331 | 0.047 | T              | G9a inhibition                                                     |
| UNC0642                               | 1.331 | 0.032 | T              | G9a inhibition                                                     |
| (d,l)-Tetrahydroberberine             | 1.357 | 0.04  | F              | DA antagonist / intrinsic fluorescence                             |
| 6-Hydroxydopamine hydrochloride       | 1.247 | 0.051 | F              | Selective catecholaminergic neurotoxin                             |
| 7-Methoxychlorpromazine hydrochloride | 1.331 | 0.119 | F              | Potential anticoagulant                                            |
| 7-Nitroindazole                       | 1.282 | 0.02  | F              | Neuronal nitric oxide synthase inhibition                          |
| Amphotericin B                        | 1.349 | 0.045 | F              | Antifungal drug                                                    |
| Bestatin                              | 1.254 | 0.045 | F              | Protease inhibitor                                                 |
| Bezafibrate                           | 1.298 | 0.028 | F              | Fibrate drug                                                       |
| Cefaclor                              | 1.253 | 0.064 | F              | Cephalosporin antibiotic                                           |
| Chlordiazepoxide                      | 1.258 | 0.062 | F              | Sedative/hypnotic drug                                             |
| Clozapine                             | 1.299 | 0.072 | F              | Atypical antipsychotic drug                                        |
| Flufenamic acid                       | 1.25  | 0.026 | F              | Anthranilic acid derivatives                                       |
| Fluphenazine HCl                      | 1.254 | 0.032 | F              | Typical antipsychotic drug                                         |
| Furosemide                            | 1.357 | 0.047 | F              | Treatment of hypertension and edema                                |
| Gabazine                              | 1.321 | 0.02  | F              | GABA <sub>A</sub> antagonist                                       |
| Iodipamide                            | 1.318 | 0.044 | F              | Contrast medium.                                                   |
| Iohexol                               | 1.257 | 0.026 | F              | Contrast medium.                                                   |
| Mebendazole                           | 1.286 | 0.043 | F              | Treating infections by worms                                       |
| Meclozine dihydrochloride             | 1.28  | 0.023 | F              | Antihistamine                                                      |
| Myricetin                             | 1.287 | 0.084 | F              | Flavonoid class of polyphenolic compounds / intrinsic fluorescence |
| Palonosetron HCl                      | 1.292 | 0.054 | F              | 5-HT <sub>3</sub> antagonist                                       |

**Supplementary Table 2. The list of initial active compounds potentially increasing over 25% of AFU in Snprn-EGFP (continued).**

| Name of compounds                              | AFU   | SEM   | True/<br>False | Note                                                        |
|------------------------------------------------|-------|-------|----------------|-------------------------------------------------------------|
| Phenylbenzene-omega-phosphono-alpha-amino acid | 1.251 | 0.021 | F              | Glycine antagonist                                          |
| Puromycin dihydrochloride                      | 1.29  | 0.013 | F              | Aminonuclease antibiotic                                    |
| Ricinine                                       | 1.316 | 0.039 | F              | An alkaloid extracted from the seeds                        |
| Salbutamol                                     | 1.257 | 0.038 | F              | $\beta$ 2-adrenergic receptor agonist                       |
| Salsolinol hydrobromide                        | 1.291 | 0.01  | F              | Metabolite of acetaldehyde and dopamine.                    |
| Selegiline hydrochloride                       | 1.333 | 0.034 | F              | Substituted phenethylamine                                  |
| Synephrine                                     | 1.286 | 0.021 | F              | An alkaloid, occurring naturally in some plants and animals |
| Terbutaline hemisulfate                        | 1.307 | 0.083 | F              | $\beta$ 2-adrenergic receptor agonist                       |
| Tetracaine hydrochloride                       | 1.346 | 0.048 | F              | Potent local anesthetic of the ester group                  |
| Tiaprofenic acid                               | 1.287 | 0.097 | F              | Non-steroidal anti-inflammatory drug (NSAID)                |



**Supplementary Table 3. List of epigenetic compounds selectively chosen for individual unsilencing test.**

| Name                   | Target / MOA                       | Effectiveness in this study |
|------------------------|------------------------------------|-----------------------------|
| 5-Aza deoxycytidine    | DNA methyltransferase / Inhibition | O                           |
| BIX01294               | G9a / Inhibition                   | X                           |
| S-Adenosyl methionine  | G9a / Cofactor                     | X                           |
| Sinefungin             | G9a / Pan inhibitor                | X                           |
| 4-Phenylbutyrate (PBA) | HDAC / Inhibition                  | X                           |
| Entinostat (MS-275)    | HDAC / Inhibition                  | X                           |
| NSC 3852               | HDAC / Inhibition                  | X                           |
| Vorinostat (SAHA)      | HDAC / Inhibition                  | X                           |
| Scriptaid              | HDAC / Inhibition                  | X                           |
| Splitomicin            | HDAC / Inhibition                  | X                           |
| Trichostatin A (TSA)   | HDAC / Inhibition                  | X                           |
| Valproic acid (VPA)    | HDAC / Inhibition                  | X                           |

**Supplementary Table 4. Summary of general health and neurological screening analysis**

| mouse ID | Sex | Geno-type | Drug Tx | Age (week) | Weight (g) | Temp (°C) | Body Posture | Tail Elevation | Pelvic Elevation | Hair Loss | Barbering |
|----------|-----|-----------|---------|------------|------------|-----------|--------------|----------------|------------------|-----------|-----------|
| 535-2    | F   | PWS       | vehicle | 12         | 17.6       | 38.8      | normal       | normal         | normal           | none      | none      |
| 536-30   | M   | PWS       | vehicle | 12         | 19.6       | 38.9      | normal       | normal         | normal           | none      | none      |
| 439-10   | F   | PWS       | UNC0642 | 12         | 17.4       | 38.6      | normal       | normal         | normal           | none      | none      |
| 439-30   | F   | PWS       | UNC0642 | 12         | 19.9       | 38.8      | normal       | normal         | normal           | none      | none      |
| 935-3    | F   | PWS       | UNC0642 | 12         | 17.4       | 38.9      | normal       | normal         | normal           | none      | none      |
| 935-10   | F   | PWS       | UNC0642 | 12         | 15.1       | 39.2      | normal       | normal         | normal           | none      | none      |
| 935-30   | F   | PWS       | UNC0642 | 12         | 14.4       | 39.2      | normal       | normal         | normal           | none      | none      |
| 574-10   | F   | PWS       | UNC0642 | 14         | 15.9       | 38.3      | normal       | normal         | normal           | none      | none      |
| 580-10   | F   | PWS       | UNC0642 | 14         | 23.1       | 38.5      | normal       | normal         | normal           | none      | none      |
| 580-30   | F   | PWS       | UNC0642 | 14         | 16.7       | 38.6      | normal       | normal         | normal           | none      | none      |
| 739-10   | M   | PWS       | UNC0642 | 15         | 23.0       | 38.4      | normal       | normal         | normal           | none      | none      |
| 739-20   | M   | PWS       | UNC0642 | 15         | 23.0       | 37.7      | normal       | normal         | normal           | none      | none      |
| 739-30   | M   | PWS       | UNC0642 | 15         | 23.0       | 36.8      | normal       | normal         | normal           | none      | none      |
| 431-10   | F   | WT        | vehicle | 12         | 20.2       | 37.6      | normal       | normal         | normal           | none      | none      |
| 431-20   | F   | WT        | vehicle | 12         | 20.5       | 38.4      | normal       | normal         | normal           | none      | none      |
| 431-30   | F   | WT        | vehicle | 12         | 21.4       | 37.1      | normal       | normal         | normal           | none      | none      |
| 535-1    | F   | WT        | vehicle | 12         | 21         | 38.0      | normal       | normal         | normal           | none      | none      |
| 536-20   | F   | WT        | vehicle | 12         | 19.1       | 37.9      | normal       | normal         | normal           | none      | none      |
| 431-1    | F   | WT        | vehicle | 12         | 20         | 38.6      | normal       | normal         | normal           | none      | none      |
| 431-2    | F   | WT        | vehicle | 12         | 20.1       | 38.4      | normal       | normal         | normal           | none      | none      |
| 431-3    | F   | WT        | vehicle | 12         | 19.3       | 38.5      | normal       | normal         | normal           | none      | none      |
| 933-10   | M   | WT        | vehicle | 14         | 30.9       | 37.8      | normal       | normal         | normal           | none      | none      |
| 933-1    | M   | WT        | vehicle | 14         | 31.1       | 38.3      | normal       | normal         | normal           | none      | none      |
| 933-3    | M   | WT        | vehicle | 14         | 31.4       | 37.6      | normal       | normal         | normal           | none      | none      |
| 933-30   | M   | WT        | vehicle | 14         | 34.2       | 37.1      | normal       | normal         | normal           | none      | none      |
| 436-1    | M   | WT        | UNC0642 | 12         | 22.4       | 37.3      | normal       | normal         | normal           | none      | none      |
| 436-2    | M   | WT        | UNC0642 | 12         | 22.6       | 37.3      | normal       | normal         | normal           | none      | none      |
| 436-3    | M   | WT        | UNC0642 | 12         | 22.5       | 38.0      | normal       | normal         | normal           | none      | none      |
| 436-10   | F   | WT        | UNC0642 | 12         | 19.8       | 37.1      | normal       | normal         | normal           | none      | none      |
| 436-30   | F   | WT        | UNC0642 | 12         | 20.8       | 37.5      | normal       | normal         | normal           | none      | none      |
| 439-3    | F   | WT        | UNC0642 | 12         | 22.8       | 37.8      | normal       | normal         | normal           | none      | none      |
| 935-1    | F   | WT        | UNC0642 | 12         | 22.4       | 37.6      | normal       | normal         | normal           | none      | none      |
| 574-1    | F   | WT        | UNC0642 | 14         | 23.6       | 37.1      | normal       | normal         | normal           | none      | none      |
| 580-1    | F   | WT        | UNC0642 | 14         | 26.4       | 38.1      | normal       | normal         | normal           | none      | none      |
| 159-1    | F   | WT        | UNC0642 | 15         | 30.0       | 37.3      | normal       | normal         | normal           | none      | none      |
| 159-2    | F   | WT        | UNC0642 | 15         | 29.0       | 37.0      | normal       | normal         | normal           | none      | none      |
| 159-3    | F   | WT        | UNC0642 | 15         | 25.0       | 36.8      | normal       | normal         | normal           | H, E *    | none      |

\* Head and between ears

**Supplementary Table 4. Summary of general health and neurological screening analysis (*continued*)**

| <b>mouse ID</b> | <b>Boli</b> | <b>Urine</b> | <b>Skin Color</b> | <b>Body Tone</b> | <b>Muscle/Fat</b> | <b>Convulsions</b> | <b>Tremor</b> | <b>Piloerection</b> |
|-----------------|-------------|--------------|-------------------|------------------|-------------------|--------------------|---------------|---------------------|
| 535-2           | 0           | 0            | normal            | normal           | normal            | none               | none          | normal              |
| 536-30          | 1           | 1            | normal            | normal           | normal            | none               | none          | normal              |
| 439-10          | 0           | 0            | normal            | normal           | normal            | none               | none          | normal              |
| 439-30          | 1           | 0            | normal            | normal           | normal            | none               | none          | normal              |
| 935-3           | 0           | 0            | normal            | normal           | normal            | none               | none          | normal              |
| 935-10          | 0           | 0            | normal            | normal           | normal            | none               | none          | normal              |
| 935-30          | 1           | 0            | normal            | normal           | normal            | none               | none          | normal              |
| 574-10          | 2           | 0            | normal            | normal           | normal            | none               | none          | normal              |
| 580-10          | 1           | 0            | normal            | normal           | normal            | none               | none          | normal              |
| 580-30          | 3           | 0            | normal            | normal           | normal            | none               | none          | normal              |
| 739-10          | 1           | 1            | normal            | normal           | normal            | none               | none          | normal              |
| 739-20          | 2           | 0            | normal            | normal           | normal            | none               | none          | normal              |
| 739-30          | 2           | 1            | normal            | normal           | normal            | none               | none          | normal              |
| 431-10          | 1           | 1            | normal            | normal           | normal            | none               | none          | normal              |
| 431-20          | 0           | 1            | normal            | normal           | normal            | none               | none          | normal              |
| 431-30          | 2           | 0            | normal            | normal           | normal            | none               | none          | normal              |
| 535-1           | 1           | 1            | normal            | normal           | normal            | none               | none          | normal              |
| 536-20          | 1           | 0            | normal            | normal           | normal            | none               | none          | normal              |
| 431-1           | 0           | 1            | normal            | normal           | normal            | none               | none          | normal              |
| 431-2           | 0           | 0            | normal            | normal           | normal            | none               | none          | normal              |
| 431-3           | 1           | 0            | normal            | normal           | normal            | none               | none          | normal              |
| 933-10          | 0           | 1            | normal            | normal           | normal            | none               | none          | normal              |
| 933-1           | 0           | 0            | normal            | normal           | normal            | none               | none          | normal              |
| 933-3           | 1           | 1            | normal            | normal           | normal            | none               | none          | normal              |
| 933-30          | 2           | 0            | normal            | normal           | normal            | none               | none          | normal              |
| 436-1           | 1           | 0            | normal            | normal           | normal            | none               | none          | normal              |
| 436-2           | 1           | 0            | normal            | normal           | normal            | none               | none          | normal              |
| 436-3           | 1           | 0            | normal            | normal           | normal            | none               | none          | normal              |
| 436-10          | 1           | 0            | normal            | normal           | normal            | none               | none          | normal              |
| 436-30          | 0           | 1            | normal            | normal           | normal            | none               | none          | normal              |
| 439-3           | 1           | 1            | normal            | normal           | normal            | none               | none          | normal              |
| 935-1           | 1           | 0            | normal            | normal           | normal            | none               | none          | normal              |
| 574-1           | 1           | 1            | normal            | normal           | normal            | none               | none          | normal              |
| 580-1           | 1           | 0            | normal            | normal           | normal            | none               | none          | normal              |
| 159-1           | 1           | 0            | normal            | normal           | normal            | none               | none          | normal              |
| 159-2           | 2           | 0            | normal            | normal           | normal            | none               | none          | normal              |
| 159-3           | 2           | 0            | normal            | normal           | normal            | none               | none          | normal              |

**Supplementary Table 4. Summary of general health and neurological screening analysis (*continued*)**

| mouse ID | Whiskers | Whisker Stop | Ear    | Lacrimation | Palperbral Closure | Exophthalmus | Eye Reflex | Grasp Coordnt |
|----------|----------|--------------|--------|-------------|--------------------|--------------|------------|---------------|
| 535-2    | normal   | normal       | normal | normal      | normal             | normal       | normal     | normal        |
| 536-30   | normal   | normal       | normal | normal      | normal             | normal       | normal     | normal        |
| 439-10   | normal   | normal       | normal | normal      | normal             | normal       | normal     | normal        |
| 439-30   | normal   | normal       | normal | normal      | normal             | normal       | normal     | normal        |
| 935-3    | normal   | normal       | normal | normal      | normal             | normal       | normal     | normal        |
| 935-10   | normal   | normal       | normal | normal      | normal             | normal       | normal     | normal        |
| 935-30   | normal   | normal       | normal | normal      | normal             | normal       | normal     | normal        |
| 574-10   | normal   | normal       | normal | normal      | normal             | normal       | normal     | normal        |
| 580-10   | normal   | normal       | normal | normal      | normal             | normal       | normal     | normal        |
| 580-30   | normal   | normal       | normal | normal      | normal             | normal       | normal     | normal        |
| 739-10   | normal   | normal       | normal | normal      | normal             | normal       | normal     | normal        |
| 739-20   | normal   | normal       | normal | normal      | normal             | normal       | normal     | normal        |
| 739-30   | normal   | normal       | normal | normal      | normal             | normal       | normal     | normal        |
| 431-10   | normal   | normal       | normal | normal      | normal             | normal       | normal     | normal        |
| 431-20   | normal   | normal       | normal | normal      | normal             | normal       | normal     | normal        |
| 431-30   | normal   | normal       | normal | normal      | normal             | normal       | normal     | normal        |
| 535-1    | normal   | normal       | normal | normal      | normal             | normal       | normal     | normal        |
| 536-20   | normal   | normal       | normal | normal      | normal             | normal       | normal     | normal        |
| 431-1    | normal   | normal       | normal | normal      | normal             | normal       | normal     | normal        |
| 431-2    | normal   | normal       | normal | normal      | normal             | normal       | normal     | normal        |
| 431-3    | normal   | normal       | normal | normal      | normal             | normal       | normal     | normal        |
| 933-10   | normal   | normal       | normal | normal      | normal             | normal       | normal     | normal        |
| 933-1    | normal   | normal       | normal | normal      | normal             | normal       | normal     | normal        |
| 933-3    | normal   | normal       | normal | normal      | normal             | normal       | normal     | normal        |
| 933-30   | normal   | normal       | normal | normal      | normal             | normal       | normal     | normal        |
| 436-1    | normal   | normal       | normal | normal      | normal             | normal       | normal     | normal        |
| 436-2    | normal   | normal       | normal | normal      | normal             | normal       | normal     | normal        |
| 436-3    | normal   | normal       | normal | normal      | normal             | normal       | normal     | normal        |
| 436-10   | normal   | normal       | normal | normal      | normal             | normal       | normal     | normal        |
| 436-30   | normal   | normal       | normal | normal      | normal             | normal       | normal     | normal        |
| 439-3    | normal   | normal       | normal | normal      | normal             | normal       | normal     | normal        |
| 935-1    | normal   | normal       | normal | normal      | normal             | normal       | normal     | normal        |
| 574-1    | normal   | normal       | normal | normal      | normal             | normal       | normal     | normal        |
| 580-1    | normal   | normal       | normal | normal      | normal             | normal       | normal     | normal        |
| 159-1    | normal   | normal       | normal | normal      | normal             | normal       | normal     | normal        |
| 159-2    | normal   | normal       | normal | normal      | normal             | normal       | normal     | normal        |
| 159-3    | normal   | normal       | normal | normal      | normal             | normal       | normal     | normal        |

**Supplementary Table 5. Summary of comprehensive blood chemistry and hematological analysis**

|                             | Normal range (Unit) | <b>WT UNC0642</b> |         | <b>PWS UNC0642</b> |         |
|-----------------------------|---------------------|-------------------|---------|--------------------|---------|
| <b>BUN</b>                  | 20.0-88.0 mg/dl     | 25.03             | ± 2.67  | 25.5               | ± 2.69  |
| <b>Creatine</b>             | 0.5-1.6 mg/dl       | 0.6               | ± 0.30  | 0.43               | ± 0.09  |
| <b>BUN/creatinine ratio</b> |                     | 66.8              | ± 25.23 | 61                 | ± 10.61 |
| <b>Phosphorus</b>           | 5.6-9.2 mg/dl       | 7.67              | ± 0.29  | 6.43               | ± 0.30  |
| <b>Calcium</b>              | 7.9-10.5 mg/dl      | 11.3              | ± 0.95  | 9.7                | ± 0.46  |
| <b>Total protein</b>        | 4.5-6.0 g/dl        | 6.1               | ± 0.95  | 5.77               | ± 0.35  |
| <b>Albumin</b>              | 3.0-4.0 g/dl        | 2.97              | ± 0.52  | 2.63               | ± 0.15  |
| <b>Globulin</b>             | g/dl                | 2.7               | ± 0.00  | 3.13               | ± 0.33  |
| <b>alb/glob ratio</b>       |                     | 0.9               | ± 0.00  | 0.87               | ± 0.09  |
| <b>Glucose</b>              | 190-280 mg/dl       | 267.67            | ± 56.16 | 254.33             | ± 29.72 |
| <b>Cholesterol</b>          | 0-0 mg/dl           | 82.5              | ± 6.12  | 95.67              | ± 2.19  |
| <b>ALT (GPT)</b>            | 10 - 89 U/l         | 28.67             | ± 6.12  | 24.67              | ± 4.06  |
| <b>AST (GOT)</b>            | 10 - 380 U/l        | 52                | ± 18.00 | 46.5               | ± 7.76  |
| <b>ALP</b>                  | 0 - 185 U/l         | 88.33             | ± 6.01  | 67.67              | ± 9.17  |
| <b>GGT</b>                  | 0 - 0 U/l           | n.d.              |         | n.d.               |         |
| <b>Total bilirubin</b>      | 0.2 - 0.8 mg/dl     | 0.5               | ± 0.06  | 0.43               | ± 0.15  |
| <b>Sodium</b>               | 143 - 150 mEq/l     | 147               | ± 1.53  | 151.33             | ± 0.67  |
| <b>Potassium</b>            | 3.8 - 10.0 mEq/l    | 7.37              | ± 1.57  | 7.2                | ± 0.67  |
| <b>Chloride</b>             | 0 - 0 mEq/l         | 111.67            | ± 0.33  | 115.67             | ± 0.88  |
| <b>Na/K ratio</b>           |                     | 21.67             | 3.84    | 21.67              | ± 2.19  |

BUN, blood urea nitrogen; ALT, alanine aminotransferase; AST, aspartate aminotransferase; ALP, Alkaline phosphatase; GGT, gamma-glutamyl transferase; n.d., not detected; n=3 per group



**Supplementary Table 5. Summary of comprehensive blood chemistry and hematological analysis (continued)**

|                                  | Normal range | (Unit) | <b>WT UNC0642</b> |         | <b>PWS UNC0642</b> |         |
|----------------------------------|--------------|--------|-------------------|---------|--------------------|---------|
| <b>Red blood cell</b>            | 7.14-12.20   | [M/UL] | 10.62             | ± 0.388 | 9.303              | ± 1.651 |
| <b>Hb conc.</b>                  | 10.8-19.2    | [G/dL] | 16.3              | ± 0.529 | 14.03              | ± 2.547 |
| <b>Hematocrit</b>                | 37.2-67.2    | [%]    | 65.1              | ± 2.042 | 47.97              | ± 8.772 |
| <b>Mean corpuscular vol</b>      | 42.6-56.0    | [fL]   | 61.33             | ± 1.859 | 51.43              | ± 0.371 |
| <b>Mean corpuscular Hb</b>       | 11.7-16.8    | [pg]   | 15.37             | ± 0.524 | 15.1               | ± 0.231 |
| <b>Mean corpuscular Hb conc.</b> | 29.1-38.0    | [g/dL] | 25.03             | ± 0.033 | 29.3               | ± 0.503 |
| <b>Reticulocyte</b>              |              | [K/uL] | 228               | ± 63.10 | 335.5              | ± 163.2 |
| <b>Platelet</b>                  | 565-2159     | [K/uL] | 1044              | ± 59.92 | 679.3              | ± 226.4 |
| <b>White blood cell</b>          | 3.9-13.96    | [K/uL] | 4.967             | ± 0.639 | 5.467              | ± 3.743 |
| <b>Neutrophil</b>                | 0.42-3.09    | [K/uL] | 1.063             | ± 0.295 | 0.557              | ± 0.393 |
| <b>Lymphocyte</b>                | 2.88-11.15   | [K/uL] | 3.55              | ± 0.559 | 4.723              | ± 3.302 |
| <b>Monocyte</b>                  | 0.00-0.94    | [K/uL] | 0.227             | ± 0.024 | 0.063              | ± 0.030 |
| <b>Eosinophil</b>                | 0.01-0.5     | [K/uL] | 0.126             | ± 0.042 | 0.123              | ± 0.027 |
| <b>Basophil</b>                  | 0.00-0.14    | [K/uL] | 0                 | ± 0.000 | 0                  | ± 0.000 |

Hb. Hemoglobin, n=3 per group
